# Supplementary material
Source: PubMed Central journal article supplement (PMC2899934)
Supplement: pp.110.155440_3.pdf [file pp.110.155440_3.pdf]

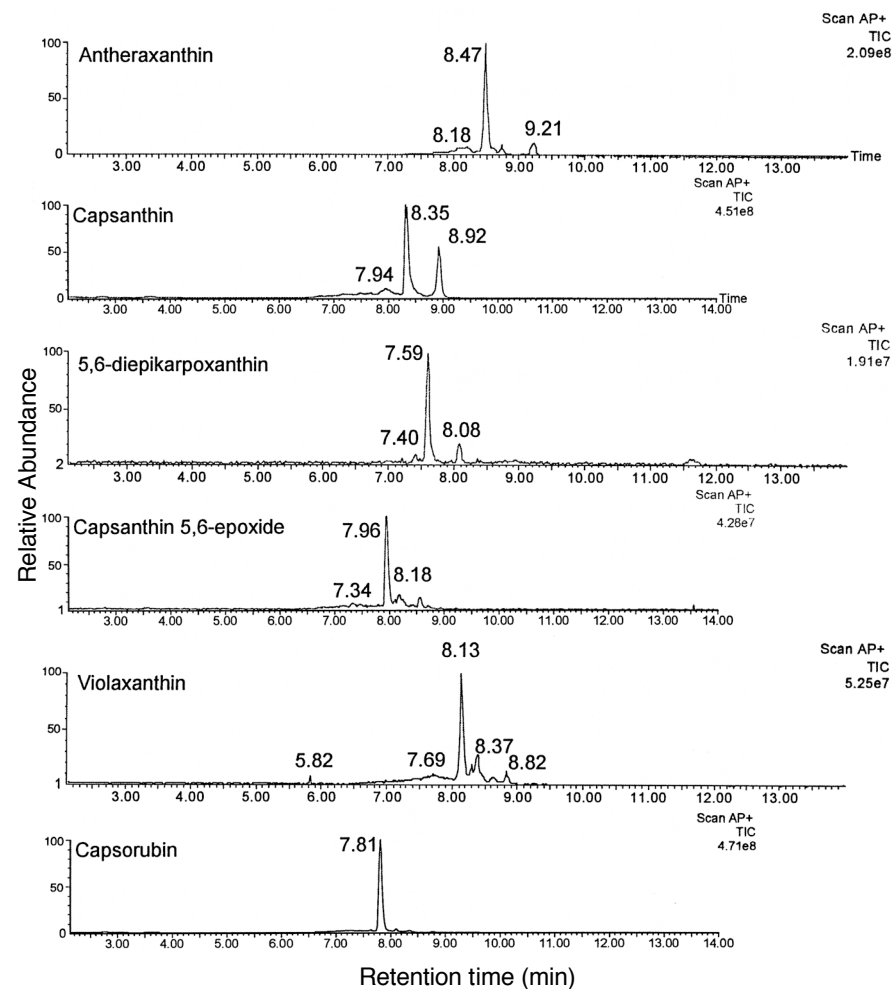

**Supplemental Figure S3.** Total ion chromatogram analysis of carotenoid products isolated from the incubation of reCCS with xanthophyll epoxides. Peaks refers to antheraxanthin (substrate) or violaxanthin (substrate) and identified products : capsanthin, 5,6-diepikarpoxanthin, capsanthin 5,6 epoxide and capsorubin.
